# Supplementary material for: ARID1B promotes DNA end resection via MDC1 and co-transactivation of DNA repair genes with c-MYC in small cell lung cancer
Source: Research Square preprint supplement (doi:10.21203/rs.3.rs-8612664/v1), 2026-02-10
Supplement: Supplementary file 1 [file 571018b90cfb35883879af4e.docx]

Primer sequences for ChIP assay and ChIP assay at IPpoI-induced double strand break.

| Description | Primers | Sequence(5’ to 3’) |
| --- | --- | --- |
| Primers for ChIP-qPCR | | |
| c-MYC-BS-1 | Forward | CCTCCACTCTCCCTGGGACTCTTGA |
| Reverse | CCTGTGAGTATAAATCATCGCAGG |
| c-MYC-BS-2 | Forward | CTGCGATGATTTATACTCACAGGAC |
| Reverse | AGGTGGGGAGGAGACTCAGCCGGG |
| Rad51-BS | Forward | CTTCTCGAGCTTCCTCAGC |
| Reverse | GCAGCTGGACTATTAGCGG |
| RNF8-BS | Forward | GTTGTACAATTGTCACCACA |
| Reverse | TACAAAGACAAAGAGCACAG |
| 28sDNA-L | Forward | GGGGAATCCGACTGTTTA |
| Reverse | ACTGGGCAGAAATCACAT |
| 28sDNA-R | Forward | TGGAGCAGAAGGGCAAAAGC |
| Reverse | TAGGAAGAGCCGACATCGAAGG |
| DAB1-L | Forward | TGTGCTCTTTCCACTGTGGT |
| Reverse | ATCACACTCTGCCACGTATG |
| DAB1-R | Forward | CCCTCTCACTTTGGAGGGGAC |
| Reverse | TTTATATAAGATGCCTGCCTGC |
| 28S rDNA-EcoR1 | Forward | GCCAAGCGTTCATAGCGA |
| Reverse | ACGGTCTAAACCCAGCTC |
