# Supplementary material for: ARID1B promotes DNA end resection via MDC1 and co-transactivation of DNA repair genes with c-MYC in small cell lung cancer
Source: Research Square preprint supplement (doi:10.21203/rs.3.rs-8612664/v1), 2026-02-10
Supplement: Supplementary file 2 [file 7940ec4bb8eaa8dd62725a5d.docx]

**Supplementary Figure legends**

**Supplementary Figure S1. *ARID1B* is overexpressed in small cell lung cancer (SCLC)**

(A) Analysis of *ARID1B* expression of cell lines from the CCLE database representing 33 cancer types. (B) Paired analysis of *ARID1B* mRNA levels in 6 SCLC tumors and matched adjacent normal tissues. (C) Validation of *ARID1B* overexpression at transcriptional level in DMS273 and SHP77 SCLC cell lines through qPCR analysis. mean ± SD, unpaired two-tailed Student's *t*-test.

**Supplementary Figure S2. *ARID1B* depletion induces apoptosis in SCLC cells**

(A) RT-qPCR analysis of *ARID1B* in DMS273 and H82 SCLC cells following *ARID1B* silencing. (mean ± SD; ****p* < 0.001; unpaired Student’s *t*-test). (B) Western blot analysis of cleaved PARP in SCLC cells after *ARID1B* silencing. (C) Flow cytometry analysis of apoptosis in DMS273 and H82 cells using FITC-Annexin V/PI double staining. (D) Body weight changes in mice bearing xenograft tumors during the experimental period.

**Supplementary Figure S3 *ARID1B* expression positively associates with DNA repair genes in SCLC cells**

(A) Bubble plot showing the top 10 enriched Gene Ontology Biological Process (GOBP) gene sets associated with high *ARID1B* expression in SCLC, as identified by Gene Set Enrichment Analysis (GSEA). (B) GSEA enrichment plot demonstrating the gene sets positively correlated with high *ARID1B* expression. Gene sets were derived from the GOBP and Reactome pathways based on SCLC transcriptomic data. (C) Scatter plots of *ARID1B* expression relative to expression of key DNA damage repair genes (*BRCA1*, *NBN*, *PARP1*, *RAD51*, *RNF8*, and *RAD50*) in SCLC primary tumors. (D-E) Representative immunofluorescence staining images (D) and quantification (E) of γH2AX and RAD51 in scramble control (SCR) and *ARID1B*-depleted H82 cells. Scale bar, 10 μM, mean ± SEM; ***p* < 0.01, ****p* < 0.001, unpaired two-tailed Student’s t-test. (F-G) RT-qPCR analysis of *PARP1*, *RAD51*, *RNF8*, and *NBN* in ARID1B-modualted SCLC cells.

**Supplementary Figure S4 ARID1B regulates MYC signaling and cellular proliferation in SCLC cells.**

(A) Gene Set Enrichment Analysis (GSEA) plots showing significant associations between *ARID1B* expression levels (upregulation/downregulation) and MYC-related gene sets from the C2 collection in SCLC. (B) Chromatin immunoprecipitation quantitative PCR (ChIP-qPCR) analysis of ARID1B binding at the *c-MYC* promoter region (BS-1) in DMS273 cells, with IgG serving as a negative control. (C) Cell viability assessed by CellTiter-Glo assay in *ARID1B*-knockdown H82 cells with c-*MYC* overexpression. mean ± SD; ***p < 0.001, unpaired two-tailed Student's *t*-test.

**Supplementary Figure S5 c-MYC cooperates with ARID1B to regulate *RNF8* and *RAD51* transcription**

(A-B) Chromatin immunoprecipitation quantitative PCR (ChIP-qPCR) analysis of c-MYC binding at the *RNF8* (A) and *RAD51* (B) promoter regions in DMS273 cells following *ARID1B* silencing, with IgG serving as a negative control. Data represent fold enrichment relative to IgG control (mean ± SD; ****p* < 0.001). (C) Sequential chromatin immunoprecipitation (re-ChIP) analysis demonstrating co-occupancy of ARID1B and c-MYC at *RNF8* and *RAD51* promoter regions in H82 cells. Graphs show fold enrichment relative to IgG control (mean ± SD; ***p* < 0.01, ****p* < 0.001). (D) SDS-PAGE validation of in vitro purified ARID domain and c-MYC proteins. (E) Electrophoretic mobility shift assay (EMSA) showing competitive binding between the ARID domain and labeled or unlabeled DNA probes. Biotin-labeled DNA probes (20 nM) were incubated with increasing concentrations of purified ARID domain (0, 0.5, 1, and 2 μg), with unlabeled DNA (200 nM) used as competitor.

**Supplementary Figure S6 ARID1B promotes DNA repair by facilitating DNA End Resection**

(A) Schematic illustration of I-PpoI-induced double-strand break (DSB) formation at the *DAB1* and *28S* rDNA genomic loci and detection strategy. (B) Western blot validation of HA and γH2AX in 293T cells upon I-PpoI-mediated DSB formation. (C) Chromatin immunoprecipitation quantitative PCR (ChIP-qPCR) analysis of ARID1B binding at the *DAB1* locus with or without I-PpoI-induced DSBs. **p* < 0.05, ***p* < 0.01. (D) RT-qPCR analysis of *MRE11* and *MDC1* mRNA expression in SCLC cells following ARID1B knockdown. (E) immunofluorescence co-staining of MDC1 and γH2AX in DMS273 cells treated with etoposide (40 μM, 1 h) following *ARID1B* silencing. ****p* < 0.001. (F) Western blot validation of p-RPA2 and RPA2 in DMS273 and H82 cells treated with etoposide upon I-PpoI-mediated DSB formation, using β-actin as loading control. (G) Western blot analysis of HA and γH2AX in 293T cells upon I-PpoI-mediated DSB formation.

**Supplementary Figure S7 ARID1B impairs homologous recombination (HR)-mediated repair under conditions of DNA damage**

(A-D) Immunofluorescence analysis of p-RPA2 (B, left panel, representative images, right panel, quantification) and RAD51 (A (DMS273), C (H82), representative images, D, quantification) foci formation in SCLC cells treated with ETO (40 μM, 1 h) or Bleo (5 μM, 1 h) following *ARID1B* knockdown. Foci were quantified in >50 cells per condition. ****p* < 0.001. (E) Comet assay demonstrating DNA damage in H82 cells following *ARID1B* silencing. Cells were treated with ETO (40 μM) or Bleo (5 μM) for 1 h followed by 4 h recovery. DNA damage was quantified as percentage of tail DNA (n ≥ 50 cells, ****p* < 0.001). Representative images and quantitative data are shown. (F-I) Immunofluorescence analysis of DNA damage markers in *ARID1B*-knockdown H82 cells treated with ETO (40 μM) (F-H) or Bleo (5 μM) (G-I) for 1 h, followed by 1 h or 4 h recovery. Foci were counted in >50 cells, ***p* < 0.01, ****p* < 0.001. Representative images (H-I) and quantitative data (F-G) are shown.

**Supplementary Figure S8 *ARID1B* deficiency sensitizes SCLC to DNA-damaging agents in vitro and in vivo.**

(A-B) Cell viability (A) and colony formation (B) assays demonstrating sensitivity of *ARID1B*-deficient SCLC cells to bleomycin. (C-D) Flow cytometry analysis of apoptosis in DMS273 (C) and H82 (D) cells treated with etoposide or bleomycin following *ARID1B* silencing. (E) Body weight changes in xenograft mouse models following chemotherapy drug administration during the experimental period.

Table S1

shRNA and siRNA sequences for gene silencing

| Genes | shRNA/siRNA | Sequence(5’ to 3’) |
| --- | --- | --- |
| ARID1B | shRNA#1 | ACCGGTACCATGAAGACTTGAACTTAATTCAAGAGATTAAGTTCAAGTCTTCATGGTTTTTTTGAATTC |
| shRNA#2 | ACCGGTAAGCAAATTGACTTTAAAGAATTCAAGAGATTCTTTAAAGTCAATTTGCTTTTTTTTGAATTC |
| c-MYC | siRNA#1 | GCTTGTACCTGCAGGATCT |
| siRNA#2 | GAGGATATCTGGAAGAAAT |
| Control | control | TTCTCCGAACGTGTCACGTTT |

Table S2

Primer sequences for qRT-PCR.

| Genes | Primers | Sequence(5’ to 3’) |
| --- | --- | --- |
| ARID1B | Forward | CTGTCGCCTCAGAGAC |
| Reverse | GTTCGATAAAAGCGCCAT |
| c-MYC | Forward | TCAAGAGGCGAACACACAAC |
| Reverse | GGCCTTTTCATTGTTTTCCA |
| PARP1 | Forward | TCTTTGATGTGGAAAGTATGAAGAA |
| Reverse | GGCATCTTCTGAAGGTCGAT |
| Rad51 | Forward | CAACCCATTTCACGGTTAGAGC |
| Reverse | TTCTTTGGCGCATAGGCAACA |
| RNF8 | Forward | CCCGGCTTCTTCGTCACAG |
| Reverse | ACCTCGCACCCATCTTCCA |
| NBS1 | Forward | CACTCACCTTGTCATGGTATCAG |
| Reverse | CTGCTTCTTGGACTCAACTGC |
| β-Actin | Forward | TCCCTGGAGAAGAGCTACGA |
| Reverse | AGCACTGTGTTGGCGTACAG |
|  |  |  |

Table S3

List of antibodies used in this study.

WB: Western blot; IF:Immunofluorescence;

ChIP:Chromatin immunoprecipitation;

| Antibody | Species | Application | | | | Suppliers |
| --- | --- | --- | --- | --- | --- | --- |
| WB | IF | ChIP | Suppliers | Cat.No |
| ARID1B | Rabbit | 1:1000 |  | 1:50 | CST | #92964S |
| c-MYC | Rabbit | 1:1000 |  |  | CST | #18583S |
| RAD51 | Rabbit | 1:1000 | 1:500 |  | Proteintech | #14961-1-AP |
| RNF8 | Rabbit | 1:1000 |  |  | Proteintech | #14112-1-AP |
| p-RPA2 | Rabbit | 1:1000 | 1:500 |  | NOVUS | #NBP1-23017 |
| RPA2 | Mouse | 1:1000 |  |  | abcam | #ab2175 |
| γ-H2AX(Ser139) | Rabbit | 1:1000 | 1:600 |  | CST | #9718S |
| γ-H2AX(Ser139) | Mouse |  | 1:600 |  | CST | #80312 |
| MDC1 | Rabbit |  | 1:300 |  | Proteintech | #83496-1-RR |
| β-Actin | Mouse | 1:5000 |  |  | Proteintech | #66009–1-Ig |
| c-MYC | Rabbit |  |  | 1:50 | abcam | #ab32072 |
| ARID1B | Mouse |  | 1:500 |  | abcam | #ab57461 |
| Ki-67 | Mouse |  |  |  | CST | #9449S |
| Cleaved Caspase-3 | Rabbit |  |  |  | CST | #9664S |
| BrdU | Mouse |  | 1:500 |  | BD | #347580 |
| MDC1 | Rabbit | 1:1000 |  |  | abcam | #ab11171 |
| Cleaved PARP | Rabbit | 1:1000 |  |  | CST | #5625 |
|  |  |  |  |  |  |  |

Table S4

Primer sequences for ChIP assay and ChIP assay at IPpoI-induced double strand break.

| Description | Primers | Sequence(5’ to 3’) |
| --- | --- | --- |
| Primers for ChIP-qPCR | | |
| c-MYC-BS-1 | Forward | CCTCCACTCTCCCTGGGACTCTTGA |
| Reverse | CCTGTGAGTATAAATCATCGCAGG |
| c-MYC-BS-2 | Forward | CTGCGATGATTTATACTCACAGGAC |
| Reverse | AGGTGGGGAGGAGACTCAGCCGGG |
| Rad51-BS | Forward | CTTCTCGAGCTTCCTCAGC |
| Reverse | GCAGCTGGACTATTAGCGG |
| RNF8-BS | Forward | GTTGTACAATTGTCACCACA |
| Reverse | TACAAAGACAAAGAGCACAG |
| 28sDNA-L | Forward | GGGGAATCCGACTGTTTA |
| Reverse | ACTGGGCAGAAATCACAT |
| 28sDNA-R | Forward | TGGAGCAGAAGGGCAAAAGC |
| Reverse | TAGGAAGAGCCGACATCGAAGG |
| DAB1-L | Forward | TGTGCTCTTTCCACTGTGGT |
| Reverse | ATCACACTCTGCCACGTATG |
| DAB1-R | Forward | CCCTCTCACTTTGGAGGGGAC |
| Reverse | TTTATATAAGATGCCTGCCTGC |
| 28S rDNA-EcoR1 | Forward | GCCAAGCGTTCATAGCGA |
| Reverse | ACGGTCTAAACCCAGCTC |

Table S5

Primer sequences for EMSA assay for dsDNA and ssDNA.

| Description | Primers Sequence(5’ to 3’) |
| --- | --- |
| Rad51-BS | Biotin-GACCTCGTGATCACAGGCATGTGCCACAAAACCTGGCTAATTTTTGTATTTTTTACTAAAGACGAGGTTTCACCACGTTGGCTCCATCTTGGGCGCGTGCCA |
| Oligo-1 | Biotin-GACGCTGCCGAATTCTACCAGTGCCTTGCTAGGACATCTTTGCCCACCTGCAG GTTCAC |
| Oligo-2 | ATAGTCGGATCCTCTAGACAGCTCCATGTAGCAAGGCACTGGTAGAATTCGGCAGCGTC |

Note: The splayed arm substrate was generated by annealing oligo 1 and oligo 2.
