# Supplementary material for: ARID1B promotes DNA end resection via MDC1 and co-transactivation of DNA repair genes with c-MYC in small cell lung cancer
Source: Research Square preprint supplement (doi:10.21203/rs.3.rs-8612664/v1), 2026-02-10
Supplement: Supplementary file 3 [file b5c5f82ceb91a9e087c63c34.docx]

shRNA and siRNA sequences for gene silencing

| Genes | shRNA/siRNA | Sequence(5’ to 3’) |
| --- | --- | --- |
| ARID1B | shRNA#1 | ACCGGTACCATGAAGACTTGAACTTAATTCAAGAGATTAAGTTCAAGTCTTCATGGTTTTTTTGAATTC |
| shRNA#2 | ACCGGTAAGCAAATTGACTTTAAAGAATTCAAGAGATTCTTTAAAGTCAATTTGCTTTTTTTTGAATTC |
| c-MYC | siRNA#1 | GCTTGTACCTGCAGGATCT |
| siRNA#2 | GAGGATATCTGGAAGAAAT |
| Control | control | TTCTCCGAACGTGTCACGTTT |
