# Supplementary material for: ARID1B promotes DNA end resection via MDC1 and co-transactivation of DNA repair genes with c-MYC in small cell lung cancer
Source: Research Square preprint supplement (doi:10.21203/rs.3.rs-8612664/v1), 2026-02-10
Supplement: Supplementary file 4 [file b842695b55e1e903da6d92b3.docx]

List of antibodies used in this study.

WB: Western blot; IF:Immunofluorescence;

ChIP:Chromatin immunoprecipitation;

| Antibody | Species | Application | | | | Suppliers |
| --- | --- | --- | --- | --- | --- | --- |
| WB | IF | ChIP | Suppliers | Cat.No |
| ARID1B | Rabbit | 1:1000 |  | 1:50 | CST | #92964S |
| c-MYC | Rabbit | 1:1000 |  |  | CST | #18583S |
| RAD51 | Rabbit | 1:1000 | 1:500 |  | Proteintech | #14961-1-AP |
| RNF8 | Rabbit | 1:1000 |  |  | Proteintech | #14112-1-AP |
| p-RPA2 | Rabbit | 1:1000 | 1:500 |  | NOVUS | #NBP1-23017 |
| RPA2 | Mouse | 1:1000 |  |  | abcam | #ab2175 |
| γ-H2AX(Ser139) | Rabbit | 1:1000 | 1:600 |  | CST | #9718S |
| γ-H2AX(Ser139) | Mouse |  | 1:600 |  | CST | #80312 |
| MDC1 | Rabbit |  | 1:300 |  | Proteintech | #83496-1-RR |
| β-Actin | Mouse | 1:5000 |  |  | Proteintech | #66009–1-Ig |
| c-MYC | Rabbit |  |  | 1:50 | abcam | #ab32072 |
| ARID1B | Mouse |  | 1:500 |  | abcam | #ab57461 |
| Ki-67 | Mouse |  |  |  | CST | #9449S |
| Cleaved Caspase-3 | Rabbit |  |  |  | CST | #9664S |
| BrdU | Mouse |  | 1:500 |  | BD | #347580 |
| MDC1 | Rabbit | 1:1000 |  |  | abcam | #ab11171 |
| Cleaved PARP | Rabbit | 1:1000 |  |  | CST | #5625 |
|  |  |  |  |  |  |  |
