# Supplementary material for: ARID1B promotes DNA end resection via MDC1 and co-transactivation of DNA repair genes with c-MYC in small cell lung cancer
Source: Research Square preprint supplement (doi:10.21203/rs.3.rs-8612664/v1), 2026-02-10
Supplement: Supplementary file 5 [file c5f3f1c68eb39ef46f0d9264.docx]

Primer sequences for EMSA assay for dsDNA and ssDNA.

| Description | Primers Sequence(5’ to 3’) |
| --- | --- |
| Rad51-BS | Biotin-GACCTCGTGATCACAGGCATGTGCCACAAAACCTGGCTAATTTTTGTATTTTTTACTAAAGACGAGGTTTCACCACGTTGGCTCCATCTTGGGCGCGTGCCA |
| Oligo-1 | Biotin-GACGCTGCCGAATTCTACCAGTGCCTTGCTAGGACATCTTTGCCCACCTGCAG GTTCAC |
| Oligo-2 | ATAGTCGGATCCTCTAGACAGCTCCATGTAGCAAGGCACTGGTAGAATTCGGCAGCGTC |

Note: The splayed arm substrate was generated by annealing oligo 1 and oligo 2.
