# Supplementary material for: ARID1B promotes DNA end resection via MDC1 and co-transactivation of DNA repair genes with c-MYC in small cell lung cancer
Source: Research Square preprint supplement (doi:10.21203/rs.3.rs-8612664/v1), 2026-02-10
Supplement: Supplementary file 6 [file da7d320618c7037cf5989382.docx]

Primer sequences for qRT-PCR.

| Genes | Primers | Sequence(5’ to 3’) |
| --- | --- | --- |
| ARID1B | Forward | CTGTCGCCTCAGAGAC |
| Reverse | GTTCGATAAAAGCGCCAT |
| c-MYC | Forward | TCAAGAGGCGAACACACAAC |
| Reverse | GGCCTTTTCATTGTTTTCCA |
| PARP1 | Forward | TCTTTGATGTGGAAAGTATGAAGAA |
| Reverse | GGCATCTTCTGAAGGTCGAT |
| Rad51 | Forward | CAACCCATTTCACGGTTAGAGC |
| Reverse | TTCTTTGGCGCATAGGCAACA |
| RNF8 | Forward | CCCGGCTTCTTCGTCACAG |
| Reverse | ACCTCGCACCCATCTTCCA |
| NBS1 | Forward | CACTCACCTTGTCATGGTATCAG |
| Reverse | CTGCTTCTTGGACTCAACTGC |
| β-Actin | Forward | TCCCTGGAGAAGAGCTACGA |
| Reverse | AGCACTGTGTTGGCGTACAG |
|  |  |  |
